# Supplementary material
Source: publisher figshare collection journal article supplement (https://acs.figshare.com/ndownloader/files/15563906)
Supplement: Supplementary file 1 [file 15563906]

## **Activating Hematite Nanoplates *via* Partial Reduction for Electrocatalytic Oxygen Reduction Reaction**

*Hao Wan,<sup>ab</sup> Menghua Lv,<sup>b</sup> Xiaohe Liu,<sup>\*a</sup> Gen Chen,<sup>a</sup> Ning Zhang,<sup>a</sup> Yijun Cao,<sup>c</sup>*

*Haidong Wang,<sup>\*b</sup> Renzhi Ma,<sup>\*d</sup> Guanzhou Qiu<sup>b</sup>*

<sup>a</sup> State Key Laboratory of Powder Metallurgy and School of Materials Science and Engineering, Central South University, No. 932 South Lushan Road, Changsha, Hunan 410083, P.R. China. Email: liuxh@csu.edu.cn

<sup>b</sup> School of Resources Processing and Bioengineering, Central South University, No. 932 South Lushan Road, Changsha, Hunan 410083, P.R. China. E-mail: joew@csu.edu.cn

<sup>c</sup> Henan Province Industrial Technology Research Institute of Resources and Materials, Zhengzhou University, No. 100 Science Avenue, Zhengzhou, Henan 450001, P. R. China.

<sup>d</sup> International Center for Materials Nanoarchitectonics (WPI-MANA), National Institute for Materials Science (NIMS), Namiki 1-1, Tsukuba, Ibaraki 305-0044, Japan. Email: MA.Renzhi@nims.go.jp

| <b>Content</b> | <b>Page No.</b> | <b>Content</b> | <b>Page No.</b> |
|----------------|-----------------|----------------|-----------------|
| Figure S1      | Page S2         | Figure S8      | Page S8         |
| Figure S2      | Page S3         | Figure S9      | Page S9         |
| Figure S3      | Page S4         | Figure S10     | Page S9         |
| Figure S4      | Page S5         | Figure S11     | Page S10        |
| Figure S5      | Page S6         | Table S1       | Page S10        |
| Figure S6      | Page S7         | Table S2       | Page S11        |
| Figure S7      | Page S8         |                |                 |

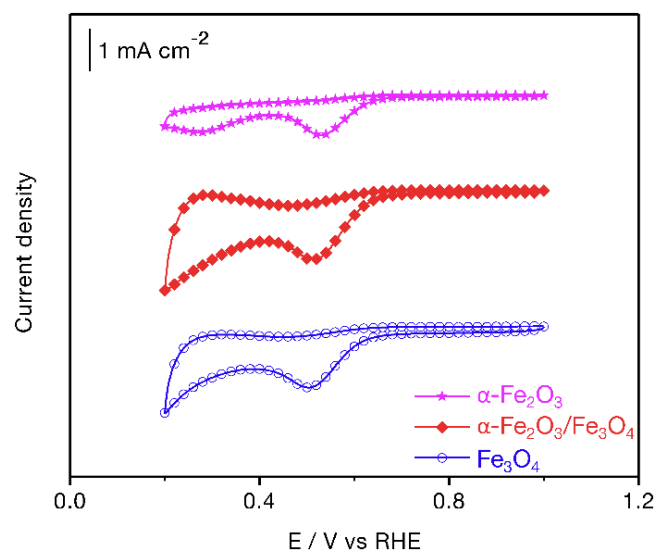

**Figure S1.** CV curves of  $\alpha\text{-Fe}_2\text{O}_3$ ,  $\alpha\text{-Fe}_2\text{O}_3/\text{Fe}_3\text{O}_4$ ,  $\text{Fe}_3\text{O}_4$  products. Here,  $\alpha\text{-Fe}_2\text{O}_3/\text{Fe}_3\text{O}_4$  composite corresponds to Sample-1h.

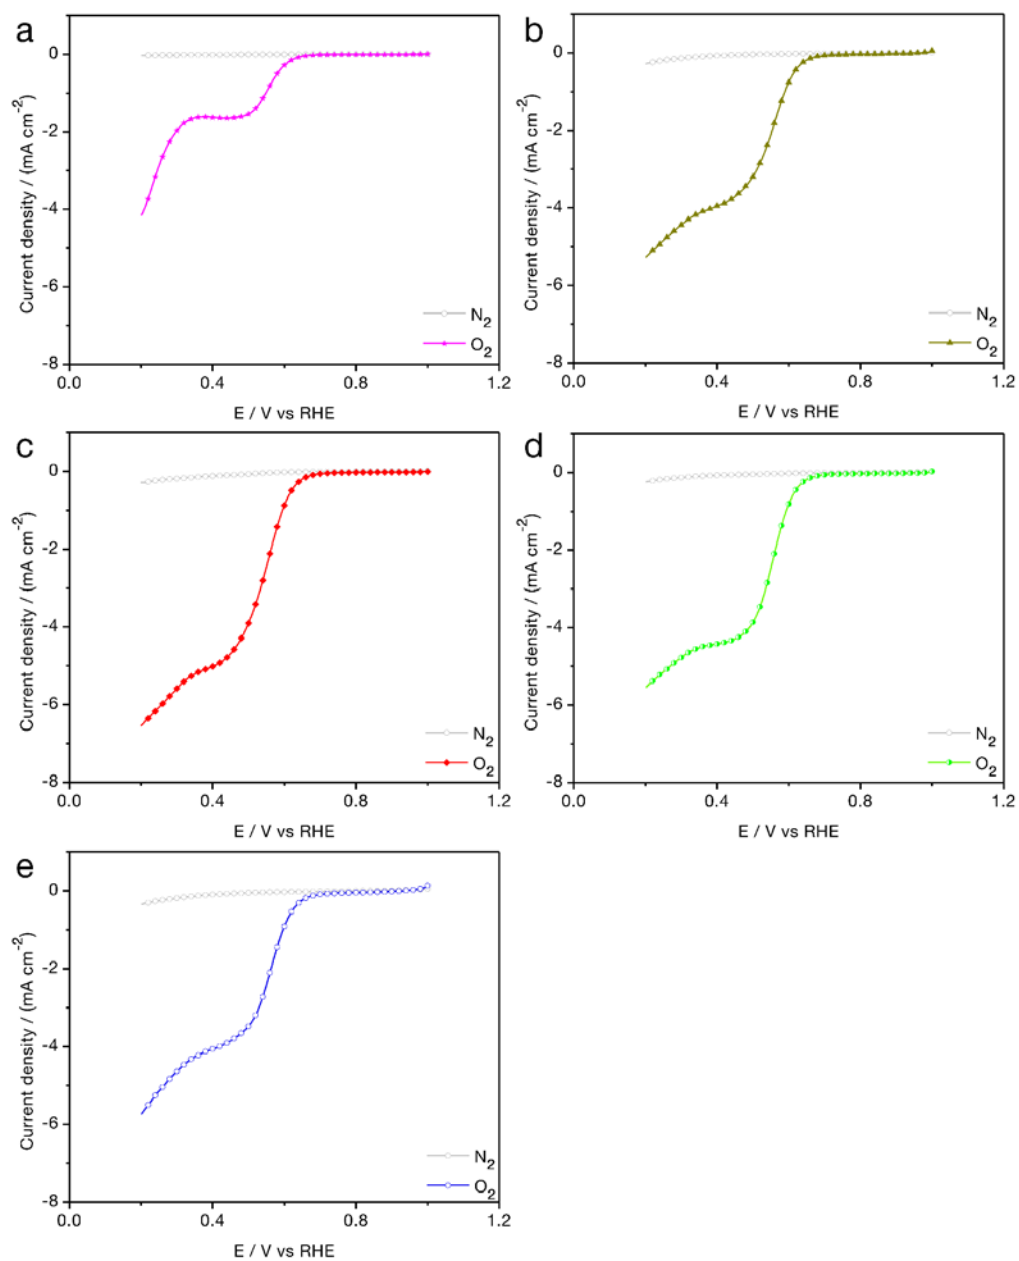

**Figure S2.** Polarization curves in N<sub>2</sub>- or O<sub>2</sub>-saturated KOH electrolyte. (a)  $\alpha$ -Fe<sub>2</sub>O<sub>3</sub> nanoplates, (b) Sample-0.5h, (c) Sample-1h, (d) Sample-3h and (e) Sample-10h.

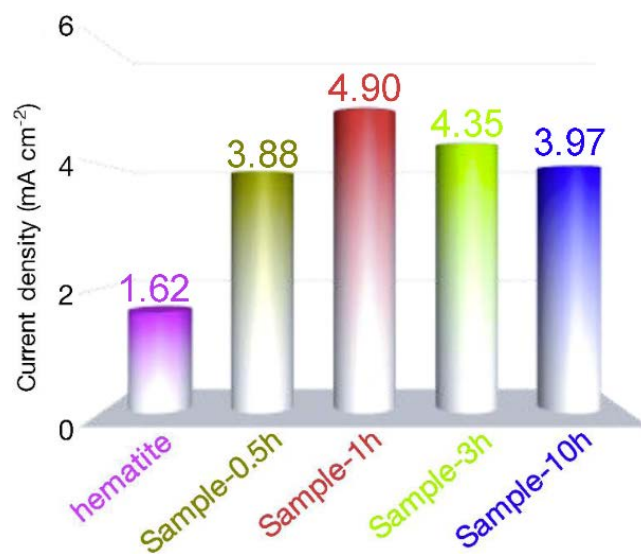

**Figure S3.** The current densities achieved by the as-prepared electrocatalysts at the potential of 0.4 V vs RHE.

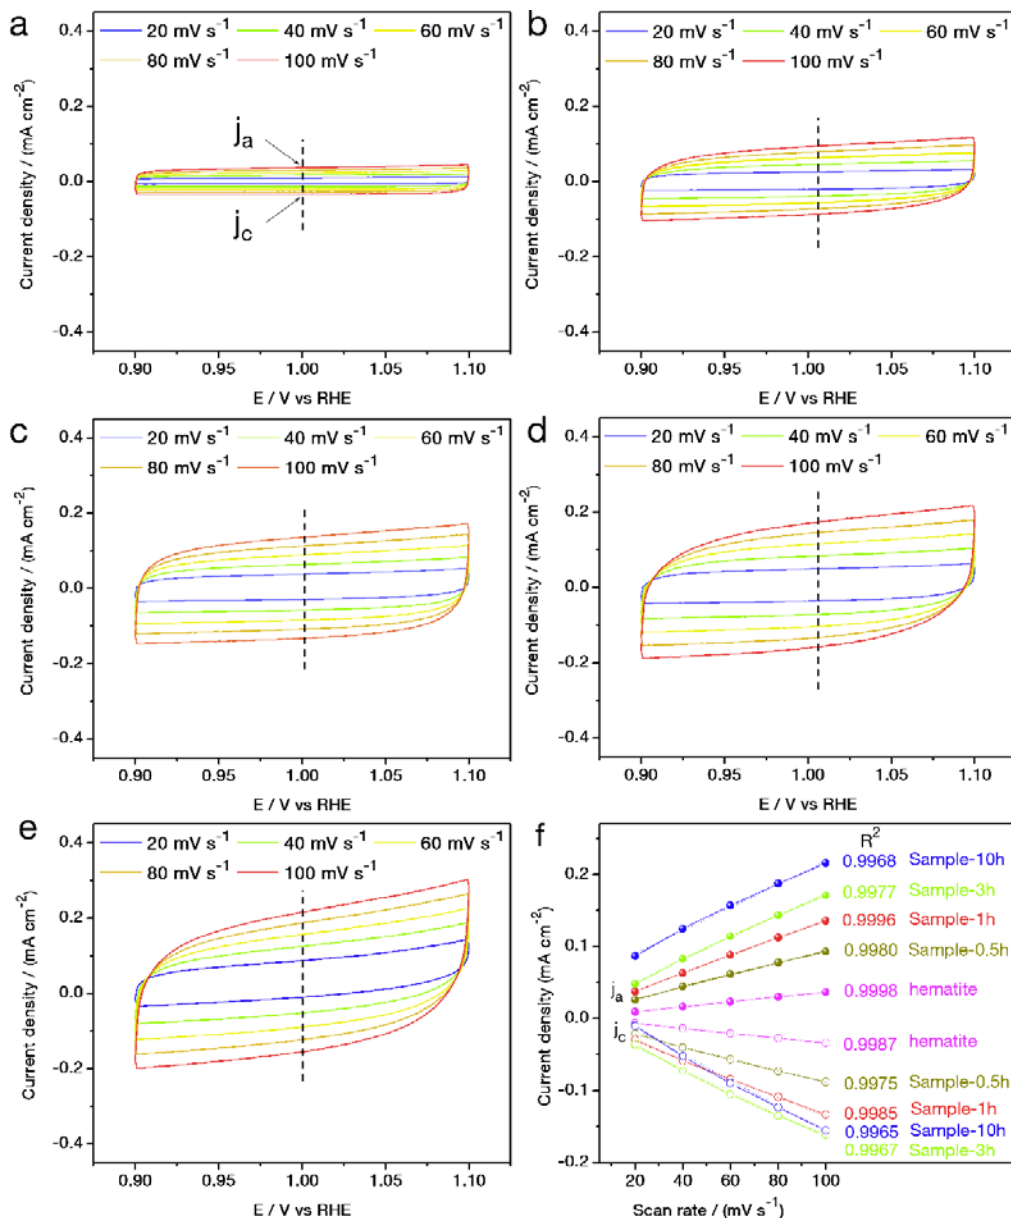

**Figure S4.** CV curves of (a)  $\alpha$ -Fe<sub>2</sub>O<sub>3</sub> nanoplates, (b) Sample-0.5h, (c) Sample-1h, (d) Sample-3h and (e) Sample-10h at different scan rates. (f) Anodic and cathodic current densities (denoted as j<sub>a</sub> and j<sub>c</sub>, respectively) of iron oxide samples at the potential of 1.0 V vs RHE as a function of the scan rate. It can be seen that there exists a highly standard linear relationship between the current density and scan rate with all the coefficient of determinations (R<sup>2</sup>) over 0.9965 close to 1, revealing that in such a potential region, all of the iron oxides almost act as an ideal double-layer capacitor.

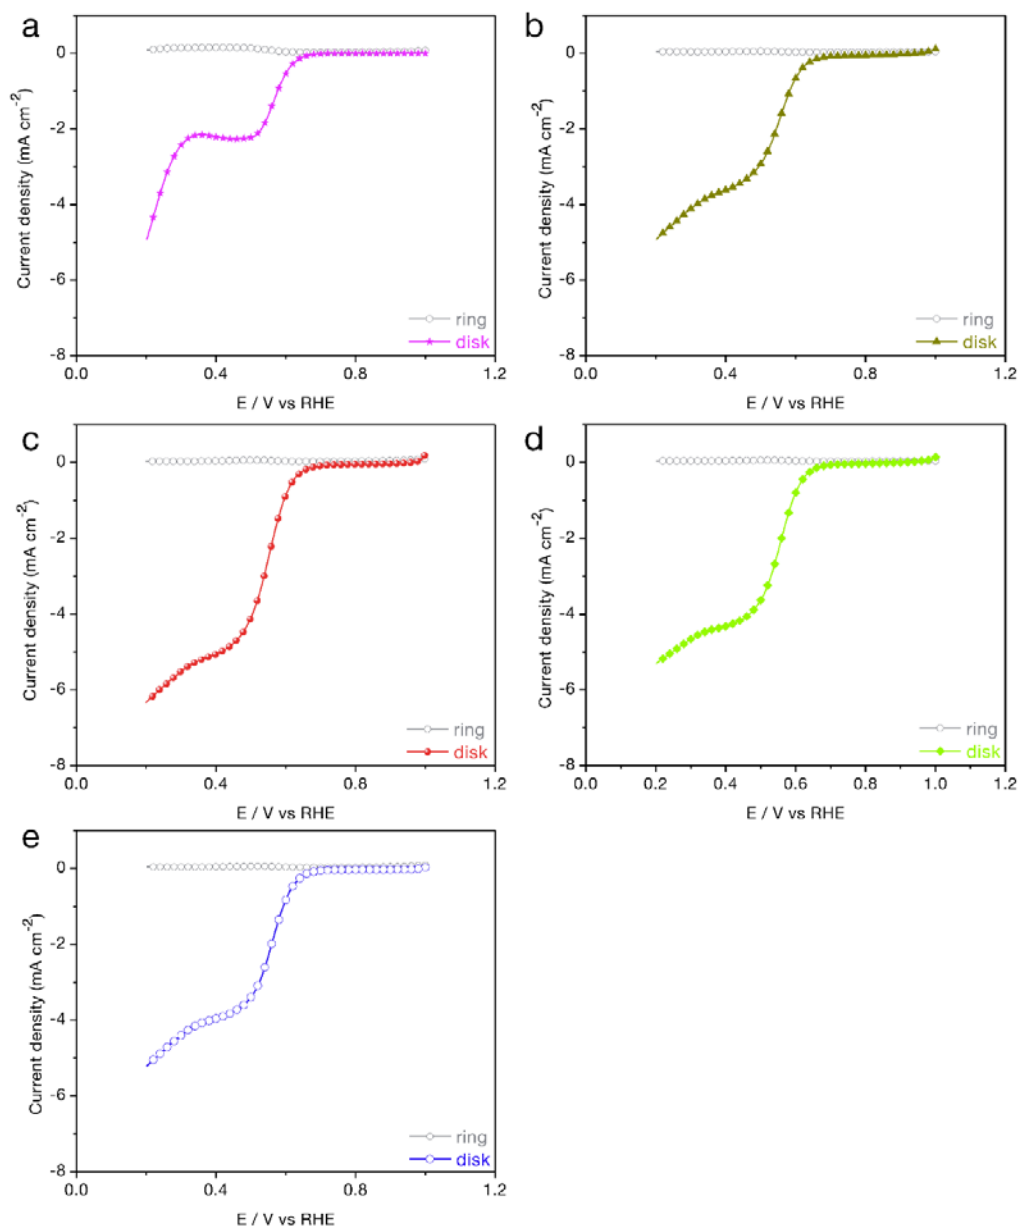

**Figure S5.** Polarization curves tested using RRDE method. (a)  $\alpha$ -Fe<sub>2</sub>O<sub>3</sub> nanoplates, (b) Sample-0.5h, (c) Sample-1h, (d) Sample-3h and (e) Sample-10h.

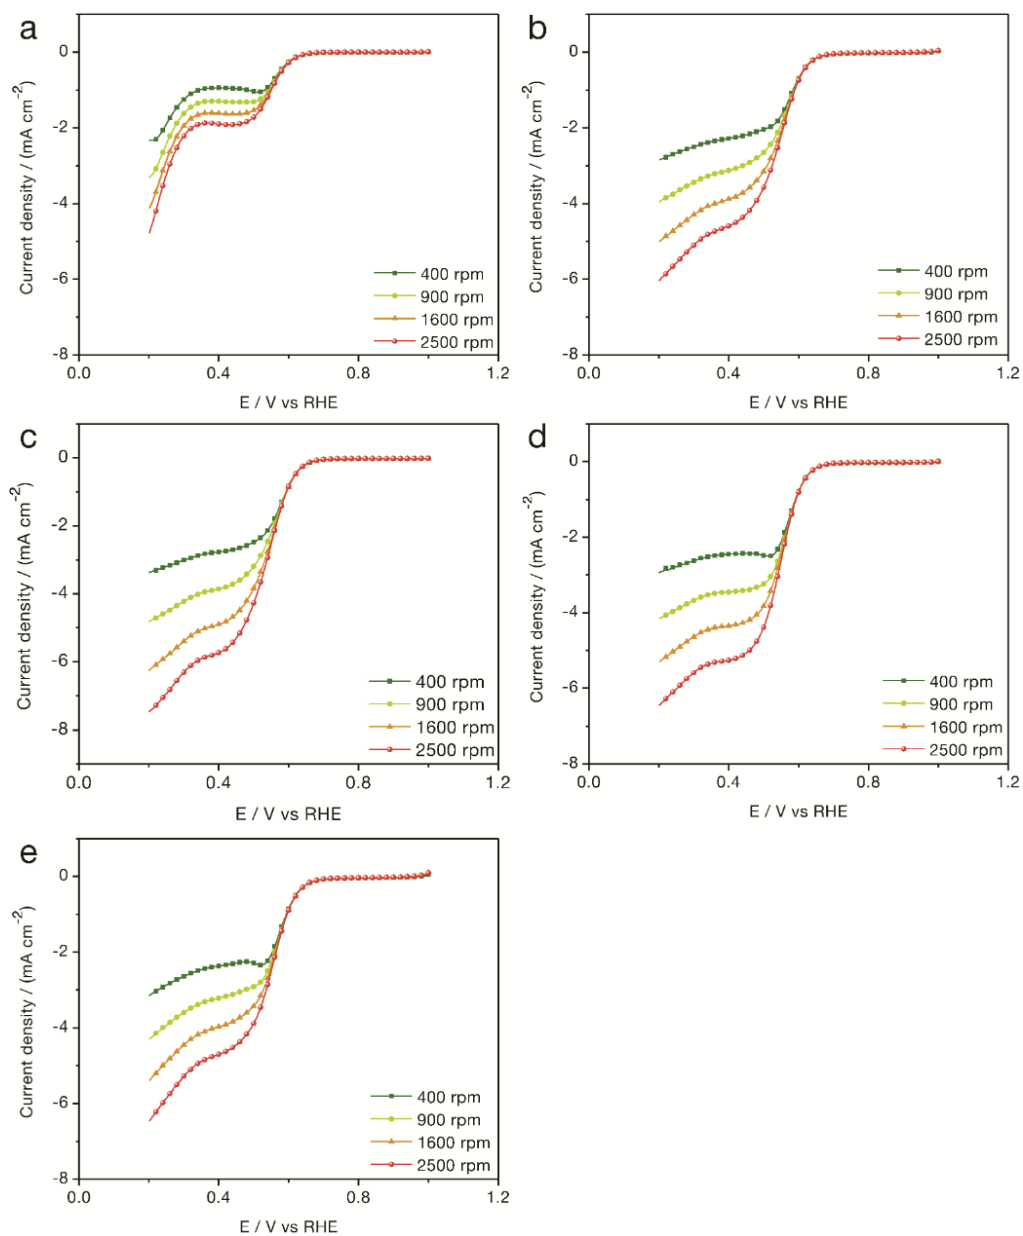

**Figure S6.** Polarization curves of as-prepared iron oxides tested at different rotating rates. (a)  $\alpha$ -Fe<sub>2</sub>O<sub>3</sub> nanoplates, (b) Sample-0.5h, (c) Sample-1h, (d) Sample-3h and (e) Sample-10h.

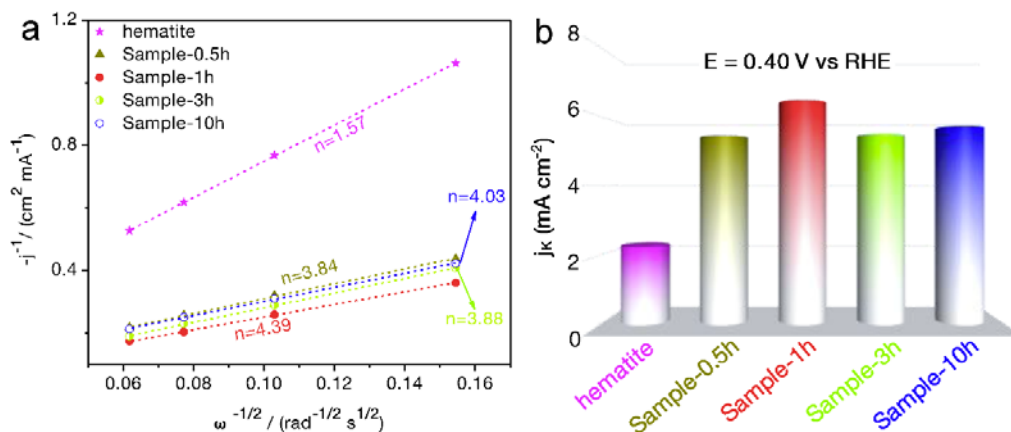

**Figure S7.** (a) Calculated electron transfer number using K-L method and (b)  $j_K$  of as-prepared iron oxide materials. Electron transfer number was estimated as 1.57, 3.84, 4.39, 3.88 and 4.03 for  $\alpha\text{-Fe}_2\text{O}_3$  nanoplates, Sample-0.5h, Sample-1h, Sample-3h and Sample-10h, respectively.

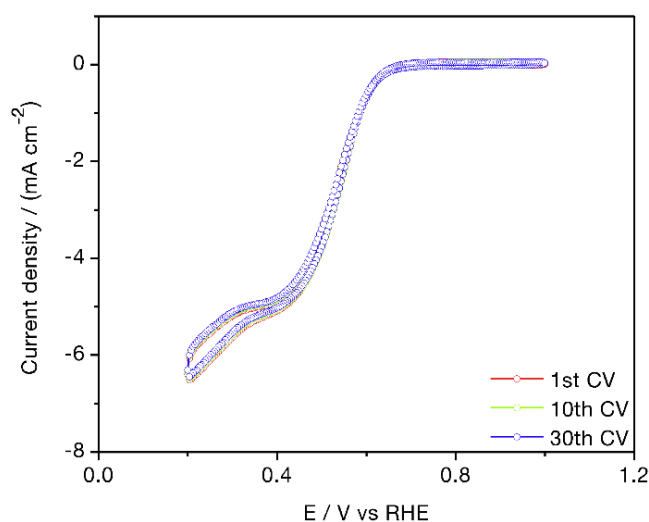

**Figure S8.** The 1st, 10th and 30th CV curves of Sample-1h.



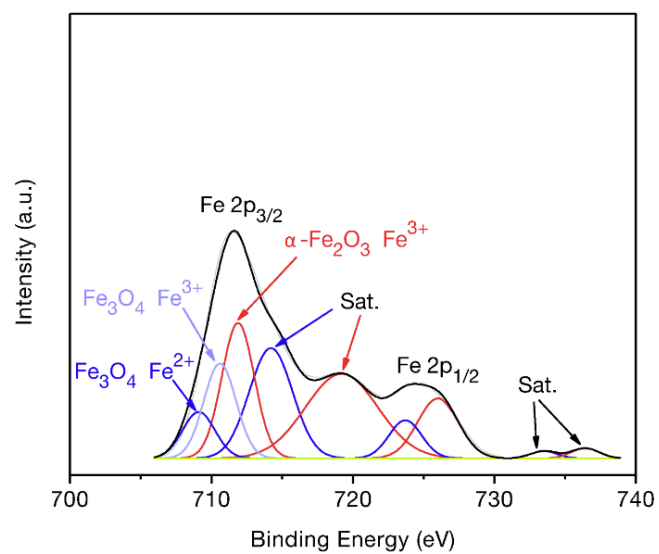

**Figure S9.** Fe 2p region of Sample-1h after a chronoamperometry measurement at 0.60 V vs RHE for 800 s.

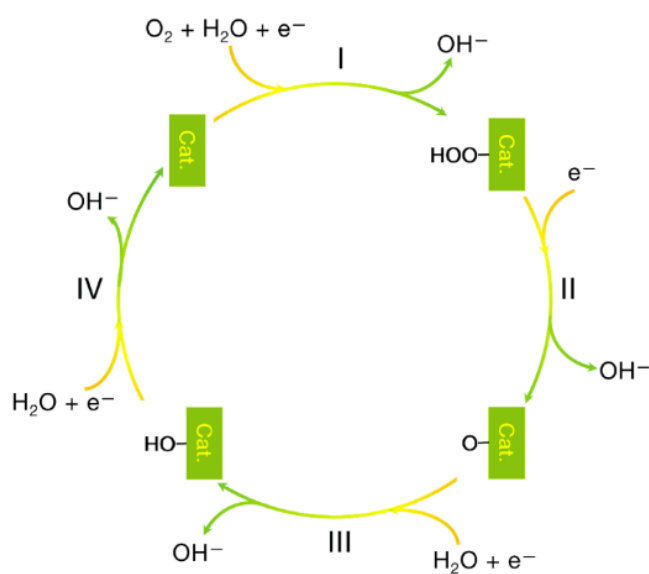

**Figure S10.** Electrocatalytic oxygen reduction process of 4-electron pathway.

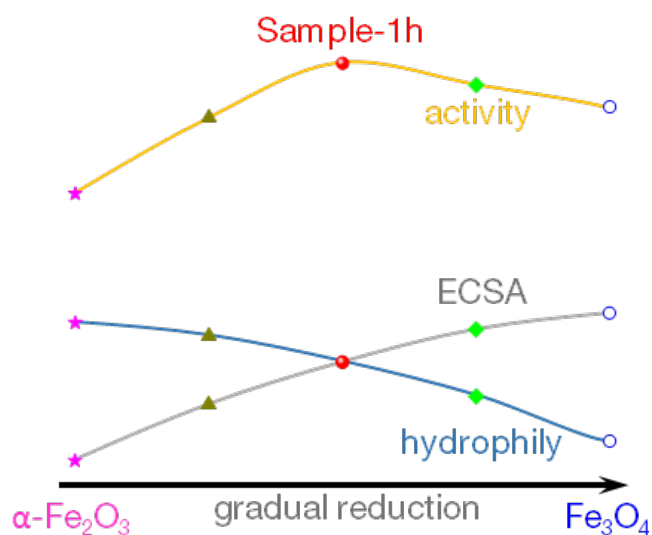

**Figure S11.** Plausible mechanism for the best performance of Sample-10h.

**Table S1.** Activity comparison of iron oxide materials for electrocatalytic oxygen reduction process in 0.1 M KOH electrolyte.

| Materials                                              | j (mA cm <sup>-2</sup> )<br>@ 0.4 V vs RHE | Tafel slope<br>(mV dec <sup>-1</sup> ) | Electron transfer<br>number | Ref.      |
|--------------------------------------------------------|--------------------------------------------|----------------------------------------|-----------------------------|-----------|
| $\alpha$ -Fe <sub>2</sub> O <sub>3</sub>               | 1.62                                       | 107                                    | 3.19 @ 0.4 V vs RHE         |           |
| Sample-0.5h                                            | 3.88                                       | 89                                     | 3.81 @ 0.4 V vs RHE         |           |
| Sample-1h                                              | 4.90                                       | 76                                     | 3.89 @ 0.4 V vs RHE         | this work |
| Sample-3h                                              | 4.35                                       | 81                                     | 3.85 @ 0.4 V vs RHE         |           |
| Sample-10h                                             | 3.97                                       | 86                                     | 3.83 @ 0.4 V vs RHE         |           |
| $\alpha$ -Fe <sub>2</sub> O <sub>3</sub> /CNTs         | 3.72                                       | –                                      | 3.45 @ 0.365 V vs RHE       | S1        |
| $\alpha$ -Fe <sub>2</sub> O <sub>3</sub> /Ppy/GO       | 1.23                                       | –                                      | 3.91 @ 0.4 V vs RHE         | S2        |
| $\alpha$ -Fe <sub>2</sub> O <sub>3</sub> /N-doped CNTs | 3.82                                       | –                                      | 3.37 @ 0.365 V vs RHE       | S3        |

**Table S2.** Fitting parameters of the electronic components in the equivalent circuit as shown in the inset of Figure 6c.

| Materials                        | R <sub>0</sub> (Ω) | R <sub>1</sub> (Ω) | R <sub>2</sub> (Ω) |
|----------------------------------|--------------------|--------------------|--------------------|
| α-Fe <sub>2</sub> O <sub>3</sub> | 66.73              | 626.8              | 290.7              |
| Sample-0.5h                      | 70.85              | 455.6              | 141.7              |
| Sample-1h                        | 64.44              | 325.6              | 140.4              |
| Sample-10h                       | 64.66              | 392.5              | 132.2              |
| Sample-10h                       | 65.22              | 450.8              | 140.5              |

## References

- (S1) Sun, M.; Dong, Y.; Zhang, G.; Qu, L.; Li, J. α-Fe<sub>2</sub>O<sub>3</sub> spherical nanocrystals supported on CNTs as efficient non-noble electrocatalysts for the oxygen reduction reaction. *J. Mater. Chem. A* **2014**, 2(33), 13635–13640, DOI: 10.1039/c4ta02172j.
- (S2) Ren, S.; Ma, S.; Yang, Y.; Mao, Q.; Hao, C. Hydrothermal synthesis of Fe<sub>2</sub>O<sub>3</sub>/polypyrrole/graphene oxide composites as highly efficient electrocatalysts for oxygen reduction reaction in alkaline electrolyte. *Electrochim. Acta* **2015**, 178, 179–189, DOI: 10.1016/j.electacta.2015.07.181.
- (S3) Sun, M.; Zhang, G.; Liu, H.; Liu, Y.; Li, J. α- and γ-Fe<sub>2</sub>O<sub>3</sub> nanoparticle/nitrogen doped carbon nanotube catalysts for high-performance oxygen reduction reaction. *Sci. China Mater.* **2015**, 58(9), 683–692, DOI: 10.1007/s40843-015-0082-x.
